# Supplementary material
Source: publisher site journal article supplement (https://cdn.jamanetwork.com/ama/content_public/journal/cardiology/939032/hoi220053supp1_prod_1667925976.88797.pdf)
Supplement: Supplementary file 1 [file hoi220053supp1_prod_1667925976.88797.pdf]

## Supplemental Online Content

Burstein DS, Rossano JW, Lindenfeld J, et al. Association of donors with US Public Health Service risk criteria and outcomes after adult vs pediatric cardiac transplant. *JAMA Cardiol*. Published online September 21, 2022.  
doi:10.1001/jamacardio.2022.3070

**eTable.** UNOS donor risk criteria for acute transmission of HIV, HBV, or HCV.

**eFigure.** Graft survival among adults who received a donor with PHS risk criteria that was declined by pediatric recipients.

This supplemental material has been provided by the authors to give readers additional information about their work.

**Supplemental Table 1. UNOS donor risk criteria for acute transmission of HIV, HBV, or HCV.**

| 1994 Center for Disease Control High-Risk Donor Criteria                                                                                                                                                                                                                                                                                                                                                                                                                                                                                                                                                                                                                                                                                                                                                                                                                                                                                                                                                                                                                                                                                                                                                                                                                                                                                                                          | 2013 Definition of Donor with Public Health Service Risk Criteria                                                                                                                                                                                                                                                                                                                                                                                                                                                                                                                                                                                                                                                                                                                                                                                                                                                                                                                                                                                                                                                                                                                                                           | 2020 Definition of Donor with Public Health Service Risk Criteria                                                                                                                                                                                                                                                                                                                                                                                                                                                                                                                                                                                                                                                                                                                                                    |
|-----------------------------------------------------------------------------------------------------------------------------------------------------------------------------------------------------------------------------------------------------------------------------------------------------------------------------------------------------------------------------------------------------------------------------------------------------------------------------------------------------------------------------------------------------------------------------------------------------------------------------------------------------------------------------------------------------------------------------------------------------------------------------------------------------------------------------------------------------------------------------------------------------------------------------------------------------------------------------------------------------------------------------------------------------------------------------------------------------------------------------------------------------------------------------------------------------------------------------------------------------------------------------------------------------------------------------------------------------------------------------------|-----------------------------------------------------------------------------------------------------------------------------------------------------------------------------------------------------------------------------------------------------------------------------------------------------------------------------------------------------------------------------------------------------------------------------------------------------------------------------------------------------------------------------------------------------------------------------------------------------------------------------------------------------------------------------------------------------------------------------------------------------------------------------------------------------------------------------------------------------------------------------------------------------------------------------------------------------------------------------------------------------------------------------------------------------------------------------------------------------------------------------------------------------------------------------------------------------------------------------|----------------------------------------------------------------------------------------------------------------------------------------------------------------------------------------------------------------------------------------------------------------------------------------------------------------------------------------------------------------------------------------------------------------------------------------------------------------------------------------------------------------------------------------------------------------------------------------------------------------------------------------------------------------------------------------------------------------------------------------------------------------------------------------------------------------------|
| <p>Risk criteria (during the 5 years before organ procurement):</p> <ol style="list-style-type: none"> <li>1. Men who had sex with another man</li> <li>2. Persons who report nonmedical intravenous, intramuscular, or subcutaneous injection of drugs</li> <li>3. Persons who have engaged in sex in exchange for money or drugs</li> <li>4. Persons with hemophilia or related clotting disorders who have received human-derived clotting factor concentrates</li> <li>5. Persons who have had sex in the preceding 12 months with any person described in above categories 1-4 or with a person known or suspected to have HIV</li> <li>6. Inmates of correctional systems at any time</li> <li>7. Persons who have been exposed in the preceding 12 months to known or suspected HIV-infected blood</li> <li>8. Children &lt; 18 months who were born to mothers with, or at risk for, HIV infection or any breast fed children of an infected mother</li> <li>9. Children born to mothers with HIV infection or mothers who meet the behavioral or laboratory criteria for adult donors (regardless of HIV status)</li> <li>10. Persons with inadequate blood samples due to refusal or hemodilution</li> <li>11. Persons whose history, physical examination, medical records, or autopsy reports reveal other evidence of HIV infection or high-risk behavior</li> </ol> | <p>Risk criteria (during the 12 months before organ procurement):</p> <ol style="list-style-type: none"> <li>1. Sex with a person known or suspected to have HIV, HBV, or HCV infection</li> <li>2. Drug injection for nonmedical reasons</li> <li>3. Man who has had sex with another man</li> <li>4. Incarceration (confinement in jail, prison, or juvenile correction facility) for <math>\geq 72</math> consecutive hours</li> <li>5. Sex in exchange for money or drugs</li> <li>6. Sex with a person who injected drugs for nonmedical reasons</li> <li>7. Sex with a person who had sex in exchange for money or drugs</li> <li>8. Unknown medical or social history</li> <li>9. Child born to a mother known to be infected with or at increased risk for HIV, HBV, or HCV infection</li> <li>10. Child who has been breastfed by a mother who is known to be infected with or at increased risk for HIV infection</li> <li>11. Woman who has had sex with a man who has had sex with another man</li> <li>12. Newly diagnosed or treated syphilis, gonorrhea, chlamydia, or genital ulcers</li> <li>13. Hemodialysis</li> <li>14. Hemodilution of the blood sample used for infectious disease testing</li> </ol> | <p>Risk criteria (during the 30 days before organ procurement):</p> <ol style="list-style-type: none"> <li>1. Sex with a person known or suspected to have HIV, HBV, or HCV infection</li> <li>2. Man who has had sex with another man</li> <li>3. Sex in exchange for money or drugs</li> <li>4. Sex with a person who had sex in exchange for money or drugs</li> <li>5. Drug injection for nonmedical reasons</li> <li>6. Sex with a person who injected drugs for nonmedical reasons</li> <li>7. Incarceration (confinement in jail, prison, or juvenile correction facility) for <math>\geq 72</math> consecutive hours</li> <li>8. Child breastfed by a mother with HIV infection</li> <li>9. Child born to a mother with HIV, HBV, or HCV infection</li> <li>10. Unknown medical or social history</li> </ol> |

**Supplemental Figure 1. Graft survival among adults who received a donor with PHS risk criteria that was declined by pediatric recipients.**

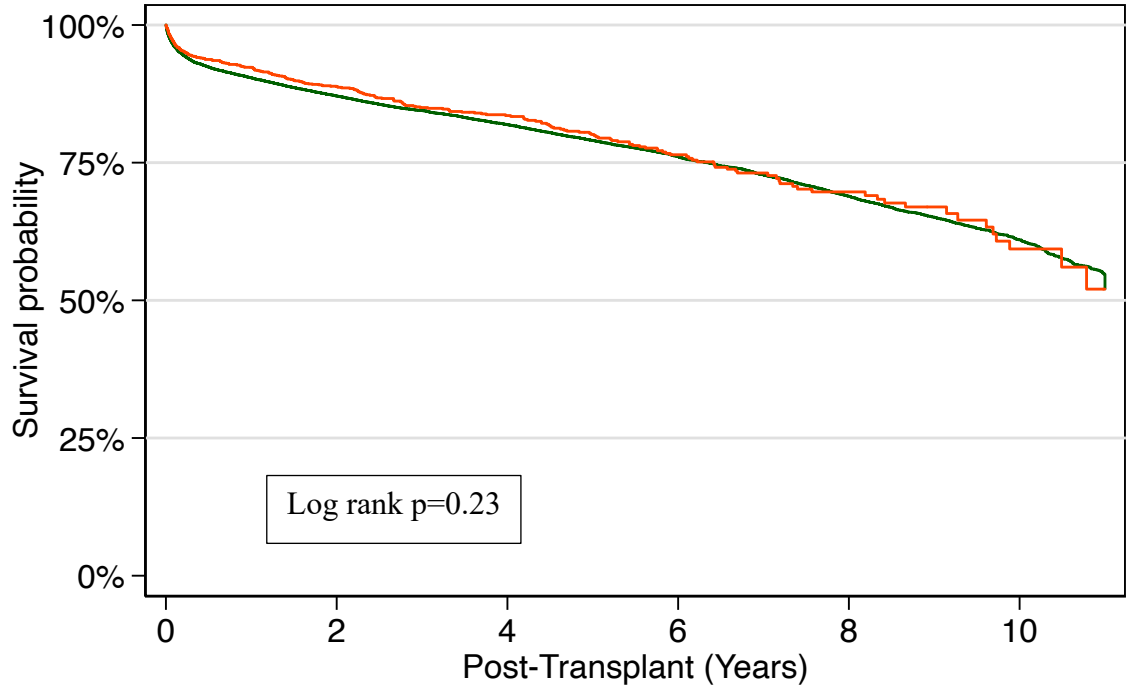

Number at risk

|             |       |       |       |      |      |      |
|-------------|-------|-------|-------|------|------|------|
| No PHS Risk | 22311 | 14643 | 10443 | 6684 | 3707 | 1206 |
| PHS Risk    | 1763  | 931   | 519   | 276  | 112  | 25   |

— No PHS Risk      — PHS Risk
